# Supplementary material
Source: Springer Nature journal article supplement (https://www.springermedizin.de/resource/supplementary/12933_2004_25_MOESM3_ESM.pdf/9539438)
Supplement: MOESM3 [file 9539438]

# VULNERABLE HOT PLAQUES: "ON FIRE"

Thin-Cap Fibrous Atheroma

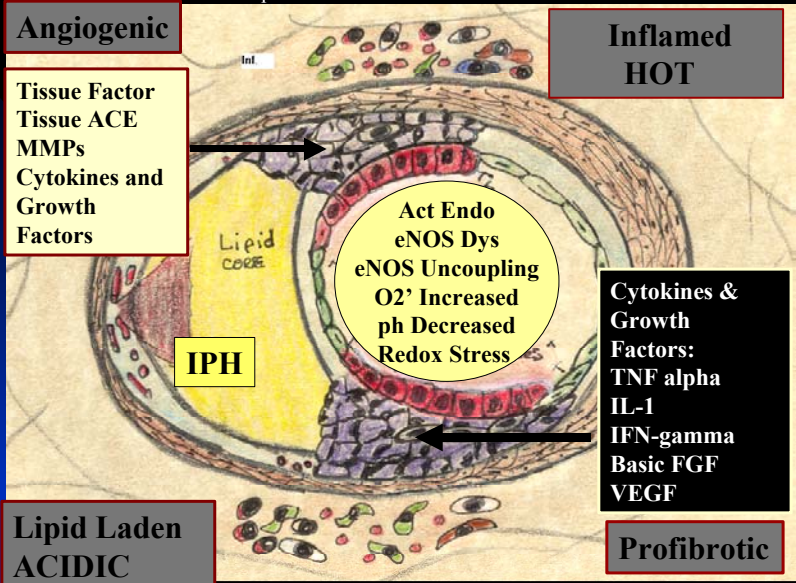

**Angiogenic**

Tissue Factor  
Tissue ACE  
MMPs  
Cytokines and  
Growth  
Factors

**Inflamed  
HOT**

**Cytokines &  
Growth  
Factors:  
TNF alpha  
IL-1  
IFN-gamma  
Basic FGF  
VEGF**

**Lipid Laden  
ACIDIC**

**Profibrotic**

**PRONE TO RUPTURE !**
